# Supplementary material
Source: MDPI journal article supplement (https://www.mdpi.com/2075-163X/11/12/1364)
Supplement: s1 [file s1]

Table S1: description of glass finds selected for this study.

| Sample | Picture                                                                            | PROVENANCE                              | Object | Typology              | Dating form | Dating context | Colour       | NCS codex       | Type of alteration |
|--------|------------------------------------------------------------------------------------|-----------------------------------------|--------|-----------------------|-------------|----------------|--------------|-----------------|--------------------|
| KK-d1  |   | KK1<br>2006<br>SU 1 east                | Wall   | <i>Not identified</i> | -           | Islamic        | Blue         | S 4040-<br>R80B | Iridescence        |
| KK-d2  |   | KK1<br>2003<br>SU 125                   | Wall   | <i>Not identified</i> | -           | Timurid        | Green/Yellow | S 0530-<br>G20Y | Iridescence        |
| KK-d3  |  | KK1<br>2008<br>SU 345<br><i>room 13</i> | Wall   | <i>Not identified</i> | -           | Islamic        | Aquamarine   | S 0530-<br>B10G | Iridescence        |

|       |                                                                                                                                                                                                                                                         |                                                |        |                           |                         |             |            |                 |                                                  |
|-------|---------------------------------------------------------------------------------------------------------------------------------------------------------------------------------------------------------------------------------------------------------|------------------------------------------------|--------|---------------------------|-------------------------|-------------|------------|-----------------|--------------------------------------------------|
| KK-d5 |  A small, irregularly shaped ceramic fragment with a blue and yellowish-green glaze. A black and white scale bar is visible at the bottom.                             | KK1<br>2006<br>SU 1 west                       | Wall   | <i>Not identified</i>     | -                       | Islamic     | Blue       | S 1555-<br>B10G | Iridescence<br>(with black<br>staining)          |
| KK-h3 |  A curved ceramic fragment, likely a handle or thumb-rest, with a yellowish-brown glaze and some black staining. A black and white scale bar is visible at the bottom. | KK1<br>2013<br>SU 665<br><i>central trench</i> | Handle | Handle with<br>thumb-rest | 6th cent. AD<br>onwards | Islamic     | Blue       | S 3040-<br>B10G | Iridescence<br>(with black<br>staining)          |
| KK-d4 |  A triangular ceramic fragment with a yellowish-brown glaze and some black staining. A black and white scale bar is visible at the bottom.                             | KK1<br>2001<br>SU 11                           | Wall   | <i>Not identified</i>     | -                       | Islamic     | Light blue | S 0530-<br>B40G | Opaque<br>weathering<br>(with black<br>staining) |
| KK-d6 |  A triangular ceramic fragment with a yellowish-brown glaze and some black staining. A black and white scale bar is visible at the bottom.                            | KK1<br>2013<br>SU 683                          | Wall   | <i>Not identified</i>     | -                       | Pre-Islamic | Light blue | S 2020-<br>B40G | Opaque<br>weathering                             |

|        |                                                                                    |                       |      |                                    |                         |             |               |                 |                                                  |
|--------|------------------------------------------------------------------------------------|-----------------------|------|------------------------------------|-------------------------|-------------|---------------|-----------------|--------------------------------------------------|
| KK-d7  | 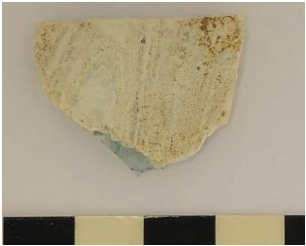  | KK1<br>2013<br>SU 683 | Wall | <i>Not identified</i>              | -                       | Pre-Islamic | Light blue    | S 2020-<br>B40G | Opaque<br>weathering<br>(with black<br>staining) |
| KK-d11 |   | KK1<br>2005<br>SU 7   | Wall | <i>Not identified</i>              | -                       | Islamic     | Colourless    | S 2005-<br>G80Y | Opaque<br>weathering                             |
| KK-r4  |  | KK1<br>2005<br>SU 1   | Rim  | Bottle with<br>cylindrical<br>neck | 8th cent. AD<br>onwards | Islamic     | Emerald green | S 7020-G        | Opaque<br>weathering<br>(with black<br>staining) |

|        |                                                                                    |                          |        |                                                            |                      |             |                     |                     |                                            |
|--------|------------------------------------------------------------------------------------|--------------------------|--------|------------------------------------------------------------|----------------------|-------------|---------------------|---------------------|--------------------------------------------|
| KK-b2  |   | KK1<br>2006<br>SU 2 west | Bottom | Bottle or bowl with honeycomb decoration and rosetta stamp | 9th-11th cent.<br>AD | Islamic     | Light green         | S 1515-G            | Opaque weathering<br>(with black staining) |
| KK-d9  |   | KK1<br>2005<br>SU 5      | Wall   | <i>Not identified</i>                                      | -                    | Islamic     | <i>Green</i>        | <i>Not valuable</i> | Blackening                                 |
| KK-d12 |   | KK1<br>2013<br>683       | bottom | <i>Not identified</i>                                      | -                    | Pre-Islamic | <i>Not valuable</i> | <i>Not valuable</i> | Blackening                                 |
| KK-d14 |  | KK1<br>2001<br>6         | Wall   | <i>Not identified</i>                                      | -                    | Islamic     | Green               | S 2050-G30Y         | Blackening                                 |

|       |                                                                                   |                     |        |              |                 |             |                    |                         |            |
|-------|-----------------------------------------------------------------------------------|---------------------|--------|--------------|-----------------|-------------|--------------------|-------------------------|------------|
| KK-b5 |  | KK1<br>2005<br>SU 5 | Bottom | Small bottle | 7th<br>cent. AD | Pre-Islamic | <i>Light green</i> | <i>Not<br/>valuable</i> | Blackening |
|-------|-----------------------------------------------------------------------------------|---------------------|--------|--------------|-----------------|-------------|--------------------|-------------------------|------------|
